# Supplementary material for: Synthesis and pharmacological activity of the epimers of hexahydrocannabinol (HHC)
Source: Sci Rep. 2023 Jul 8;13:11061. doi: 10.1038/s41598-023-38188-5 (PMC10329643; doi:10.1038/s41598-023-38188-5)
Supplement: Supplementary file 1 — Supplementary Information. [file 41598_2023_38188_MOESM1_ESM.docx]

**Synthesis and pharmacological activity of the epimers of hexahydrocannabinol (HHC)**

Fabiana Russoa,b, Maria Angela Vandellic, Giuseppe Biaginib, Martin Schmidd, Livio Luongoe, Michela Perronee, Federica Ricciardie, Sabatino Maionee, Aldo Laganàf, Anna Laura Capriottif, Alfonso Gallog, Luigi Carboneh, Elisabetta Perroneh, Giuseppe Giglih, Giuseppe Cannazzac,h,[[1]](#footnote-1)*, Cinzia Cittih,c,*

a Clinical and Experimental Medicine PhD Program, University of Modena and Reggio Emilia, 41125 – Modena, Italy

b Department of Biomedical, Metabolic and Neural Sciences, University of Modena and Reggio Emilia, 41125 – Modena, Italy

c Department of Life Sciences, University of Modena and Reggio Emilia, Via Campi 103, 41125 – Modena, Italy

d Institute of Pharmaceutical Sciences, Department of Pharmaceutical Chemistry, University of Graz, Schubertstraße 1, Graz, A-8010, Austria

e Department of Experimental Medicine, Division of Pharmacology, Università della Campania “L. Vanvitelli”, Via Santa Maria di Costantinopoli 16, 80138, Naples, Italy.

f Department of Chemistry, Sapienza University of Rome, Piazzale Aldo Moro 5, 00185 – Rome, Italy

g Department of Chemistry, Istituto Zooprofilattico Sperimentale del Mezzogiorno, Via Salute 2, 80055 Portici, Italy

h Institute of Nanotechnology – CNR NANOTEC, Campus Ecotekne, Via Monteroni, 73100 – Lecce, Italy

**Table of Content**

| **Table S1.** 1H NMR assignments (δ) of (9*S*)-HHC and (9*R*)-HHC | … SI-2 |
| --- | --- |
| **Figure S1.** 1H NMR spectroscopic characterization of (9*S*)-HHC | … SI-3 |
| **Figure S2.** 13C NMR spectroscopic characterization of (9*S*)-HHC | … SI-3 |
| **Figure S3.** 1H NMR spectroscopic characterization of (9*R*)-HHC | … SI-4 |
| **Figure S4.** 13C NMR spectroscopic characterization of (9*R*)-HHC | … SI-4 |
| **Figure S5.** HPLC-UV chromatograms of the analysed samples | … SI-5 |
| **Figure S6.** MS data of the unknown impurity in sample HHC-4 | … SI-6 |
| **Table S2.** Calibration parameters of the analytes | … SI-7 |

**Table S1.** 1H NMR assignments for (9S)-HHC and (9R)-HHC**.** In bold the discriminant signals.

|  | 1H chemical shifts (ppm) | |
| --- | --- | --- |
|  |  |  |
| Atom number | **(9*S*)-HHC** | **(9*R*)-HHC** |
| 2 | 6.07 | 6.07 |
| 4 | 6.25 | 6.25 |
| 6a | 1.46-1.44 | 1.46-1.44 |
| 7 | 1.68-1.61 | 1.87-1.80  1.16-1.07 |
| 8 | 1.68-1.61 | 1.87-1.80  1.16-1.07 |
| 9 | 2.11 | 1.67-1.60 |
| 10a | **2.67** | **2.49-2.37** |
| 10α | **2.92-2.79** | **3.03** |
| 10β | 1.33-1.28 | 0.78 |
| 11 | **1.13** | **0.94** |
| 12 | 1.36 | 1.36 |
| 13 | 1.09 | 1.06 |
| -OH | 4.61 | 4.64 |
| 1’ | 2.46-2.38 | 2.49-2.37 |
| 2’ | 1.58-1.52 | 1.59-1.52 |
| 3’ | 1.33-1.28 | 1.34-1.24 |
| 4’ | 1.33-1.28 | 1.34-1.24 |
| 5’ | 0.88 | 0.88 |

**Figure S1.** 1H NMR of (9S)-HHC

**Figure S2.** 13C NMR of (9S)-HHC

**Figure S3.** 1H NMR of (9R)-HHC

**Figure S4.** 13C NMR of (9S)-HHC


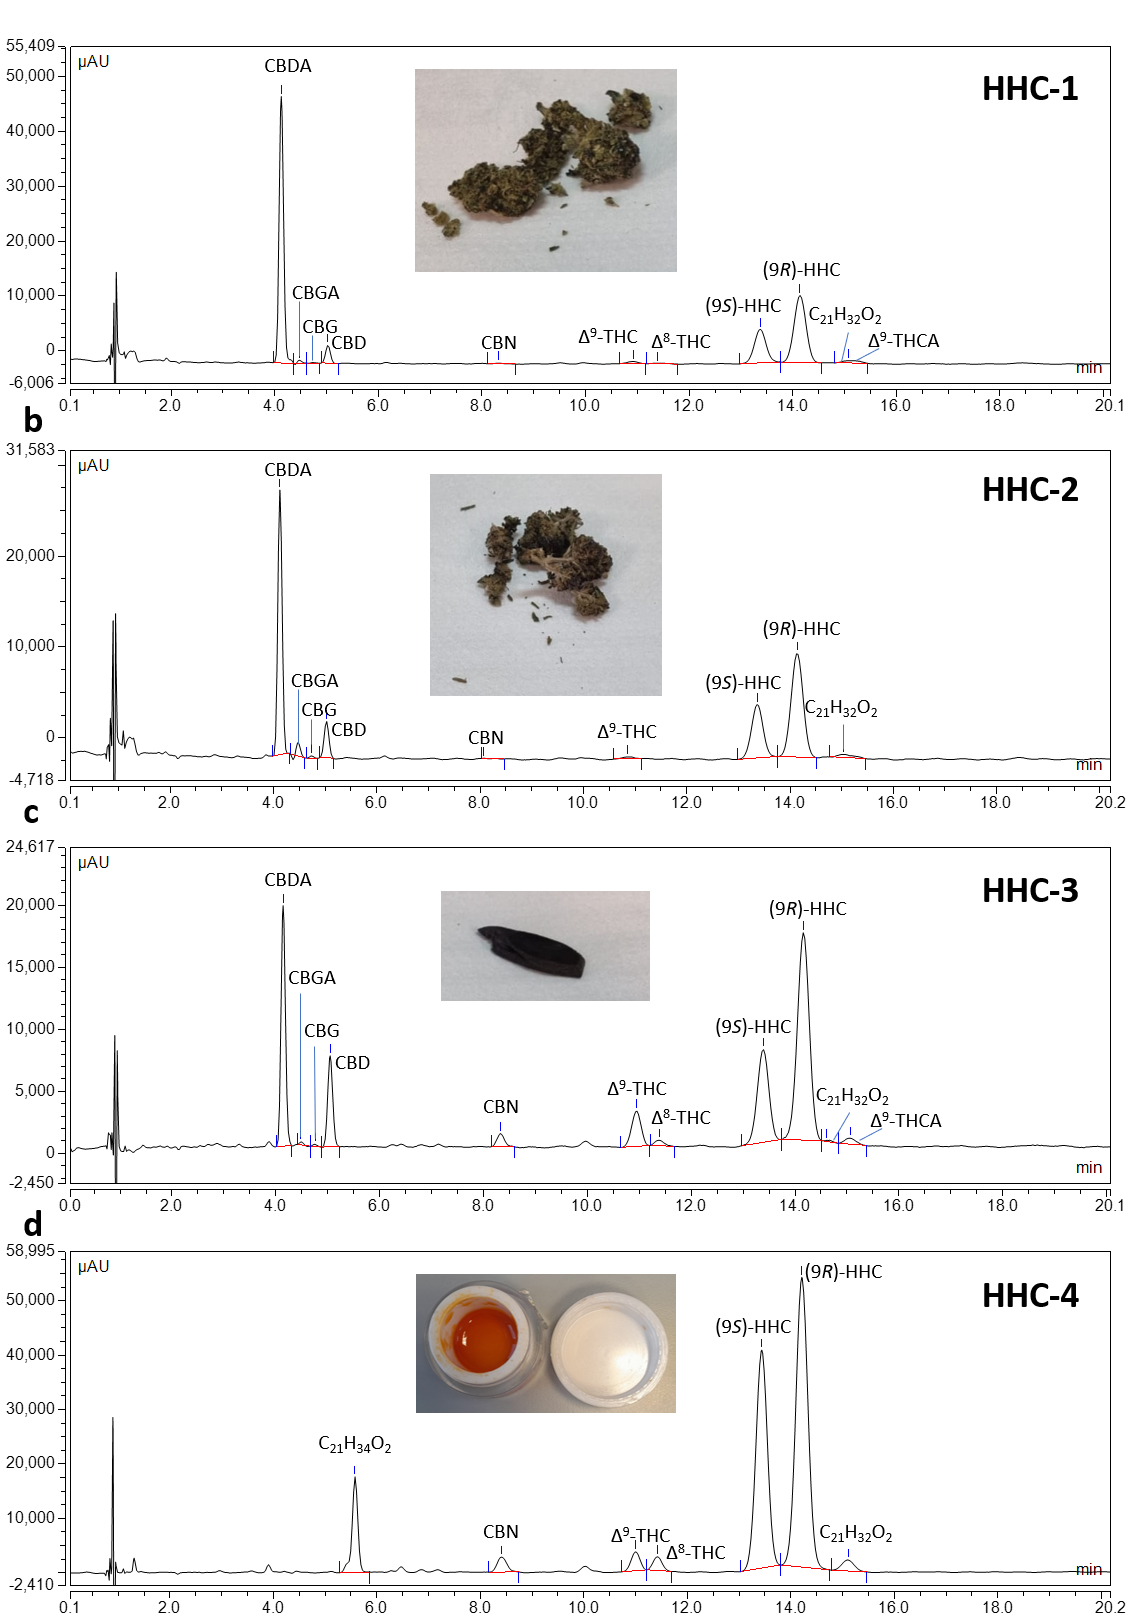


**Figure S5.** HPLC-UV chromatograms of the four samples: industrial hemp inflorescences (HHC-1 (**a**) and HHC-2 (**b**)), HHC hashish (HHC-3) (**c**) and pure HHC (HHC-4) (**d**). Picture of each sample is attached to the corresponding chromatogram.


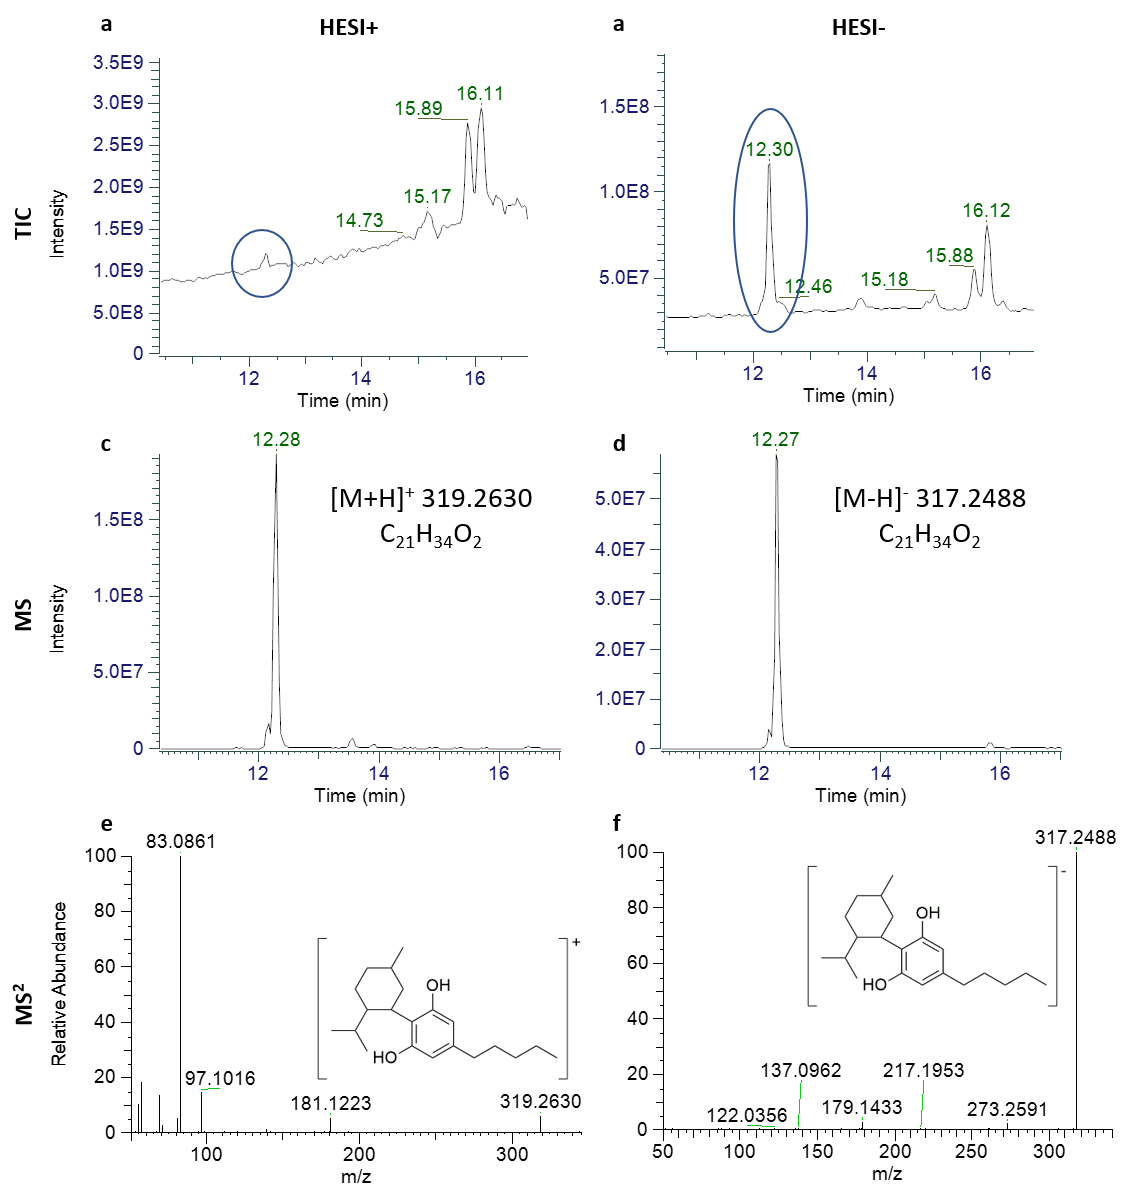


**Figure S6.** MS data of unknown impurity in sample HHC-4. Total ion current in HESI+ (**a**) and HESI- mode (**b**); extracted exact mass in HESI + (**c**) and HESI- mode (**d**); MS2 spectrum in HESI+ and HESI- mode (f).

**Table S2.** UV Calibration parameters (linearity range and coefficient of determination R2), retention time (RT) and MS precursor ions in HESI+ and HESI- mode of the analytes.

| Compound | *RT* (min) | [M+H]+ | [M-H]- | Linearity range (µg/mL) | *R2* |
| --- | --- | --- | --- | --- | --- |
| CBDA | 11.60 | 359.2217 | 357.2071 | 0.1-10.0 | 0.99791 |
| CBGA | 12.10 | 361.2373 | 359.2228 | 0.1-10.0 | 0.99833 |
| CBG | 12.30 | 317.2475 | 315.2330 | 0.1-10.0 | 0.99939 |
| CBD | 12.42 | 315.2319 | 313.2173 | 0.1-10.0 | 0.99813 |
| CBN | 14.60 | 311.2006 | 309.1864 | 0.1-10.0 | 0.99951 |
| Δ9-THC | 15.73 | 315.2319 | 313.2173 | 0.1-10.0 | 0.99938 |
| Δ8-THC | 15.95 | 315.2319 | 313.2173 | 0.1-10.0 | 0.99917 |
| CBC | 16.55 | 315.2319 | 313.2173 | 0.1-10.0 | 0.99810 |
| (9*S*)-HHC | 16.59 | 317.2475 | 315.2330 | 1.0-20.0 | 0.99959 |
| (9*R*)-HHC | 16.88 | 317.2475 | 315.2330 | 1.0-20.0 | 0.99959 |
| Δ9-THCA | 17.20 | 359.2217 | 357.2071 | 0.1-10.0 | 0.99874 |
| CBCA | 17.90 | 359.2217 | 357.2071 | 0.1-10.0 | 0.99746 |

1. * Corresponding authors:

   Giuseppe Cannazza, Ph.D., Email: [giuseppe.cannazza@unimore.it](mailto:giuseppe.cannazza@unimore.it); Tel.: +39 059 2055013.; Fax: +39 059 2055750.

   Cinzia Citti, Ph.D., Email: [cinzia.citti@unimore.it](mailto:cinzia.citti@unimore.it); Tel.: +39 0832 319206. [↑](#footnote-ref-1)
